# Supplementary material for: Facile preparation, catalytic performance and reaction mechanism of MnxCo1−xOδ/3DOM-m Ti0.7Si0.2W0.1Oycatalysts for the simultaneous removal of soot and NOx
Source: Royal Society of Chemistry journal article supplement (doi:10.1039/d2cy00077f), 2022-01-01
Supplement: d2cy00077f1.pdf [file d2cy00077f1.pdf]

## Supporting information

# Facile preparation, catalytic performance and reaction mechanism of $Mn_xCo_{1-x}O_\delta/3DOM-m Ti_{0.7}Si_{0.2}W_{0.1}O_y$ catalysts for the simultaneous removal of soot and $NO_x$

Lanyi Wang<sup>a</sup>, Yu Ren<sup>a</sup>, Xuehua Yu<sup>\*b</sup>, Di Yu<sup>a</sup>, Chao Peng<sup>b</sup>, Qiang Zhou<sup>a</sup>, Jia Hou<sup>a</sup>, Chengming Zhong<sup>a</sup>, Chengyang Yin<sup>b</sup>, Xiaoqiang Fan<sup>b</sup>, Zhen Zhao<sup>\*a,b</sup>, Kai Cheng<sup>c</sup>, Yongsheng Chen<sup>c</sup>, Zbigniew Sojka<sup>d</sup>, Andrzej Kotarba<sup>d</sup>, Yuechang Wei<sup>a</sup>, Jian Liu<sup>a</sup>

<sup>a</sup> State Key Laboratory of Heavy Oil Processing, China University of Petroleum, 18# Fuxue Road, Chang Ping, Beijing 102249, China.

<sup>b</sup> Institute of Catalysis for Energy and Environment, College of Chemistry and Chemical Engineering, Shenyang Normal University, Shenyang, Liaoning, 110034, China.

<sup>c</sup> Energy and Catalysis Laboratory, Department of Mechanical and Automation Engineering, The Chinese University of Hong Kong, Shatin, NT, Hong Kong SAR (China)

<sup>d</sup> Faculty of Chemistry, Jagiellonian University, Gronostajowa 2, 30-387 Kraków, Poland

\* Corresponding author: Zhen Zhao, State Key Laboratory of Heavy Oil Processing, China University of Petroleum, 18# Fuxue Road, Chang Ping, Beijing 102249, China. Email: [zhenzhao@cup.edu.cn](mailto:zhenzhao@cup.edu.cn); [zhaozhen1586@163.com](mailto:zhaozhen1586@163.com), Tel: +86-24-86579800.

\* Corresponding author: Xuehua Yu, Institute of Catalysis for Energy and Environment, College of Chemistry and Chemical Engineering, Shenyang Normal University, Shenyang, Liaoning, 110034, China. Email: [yuxuehua1986@163.com](mailto:yuxuehua1986@163.com); Tel: +86-24-82574216.

Includes 17 pages, 7 Figures, 5 Tables

## CONTENTS

|                                                                                                                                                                                                                                                                                                                                                                                                                                                                                                                                                                                                                                                  |            |
|--------------------------------------------------------------------------------------------------------------------------------------------------------------------------------------------------------------------------------------------------------------------------------------------------------------------------------------------------------------------------------------------------------------------------------------------------------------------------------------------------------------------------------------------------------------------------------------------------------------------------------------------------|------------|
| <b>Table S1</b> Textural properties of as-prepared catalysts.....                                                                                                                                                                                                                                                                                                                                                                                                                                                                                                                                                                                | <b>S5</b>  |
| <b>Table S2</b> Performance of various catalysts for SCR reaction.....                                                                                                                                                                                                                                                                                                                                                                                                                                                                                                                                                                           | <b>S6</b>  |
| <b>Table S3</b> Performance of various catalysts for soot removal .....                                                                                                                                                                                                                                                                                                                                                                                                                                                                                                                                                                          | <b>S7</b>  |
| <b>Table S4</b> Performance of various catalysts for simultaneous removal of soot and NO <sub>x</sub> .....                                                                                                                                                                                                                                                                                                                                                                                                                                                                                                                                      | <b>S8</b>  |
| <b>Table S5</b> The reaction rate (r) for NH <sub>3</sub> -SCR/soot combustion and the amount of active oxygen species (O <sub>amount</sub> ) for soot combustion. ....                                                                                                                                                                                                                                                                                                                                                                                                                                                                          | <b>S9</b>  |
| <b>Fig. S1.</b> CO <sub>2</sub> concentrations at 350 °C as a function of time over catalysts before and after O <sub>2</sub> is removed from the reactant feed.<br><br>(Reaction conditions: (A) 1000 ppm NO, 1000 ppm NH <sub>3</sub> , 5% O <sub>2</sub> , 5% H <sub>2</sub> O, balance N <sub>2</sub> , flow rate = 150 ml min <sup>-1</sup> ) .....                                                                                                                                                                                                                                                                                         | <b>S10</b> |
| <b>Fig. S2.</b> X-ray diffraction patterns of Mn <sub>x</sub> Co <sub>1-x</sub> O <sub>8</sub> /3DOM-m TiSiWO catalysts with different x values. (d: Mn <sub>0.6</sub> Co <sub>0.4</sub> O <sub>8</sub> /3DOM-m TiSiWO, e: Mn <sub>0.5</sub> Co <sub>0.5</sub> O <sub>8</sub> /3DOM-m TiSiWO) .....                                                                                                                                                                                                                                                                                                                                              | <b>S11</b> |
| <b>Fig. S3.</b> Nitrogen adsorption-desorption isotherms of Mn <sub>x</sub> Co <sub>1-x</sub> O <sub>8</sub> /3DOM-m TiSiWO catalysts with different x values<br><br>(a: 3DOM-m TiSiWO, b: MnO <sub>8</sub> /3DOM-m TiSiWO, c: Mn <sub>0.8</sub> Co <sub>0.2</sub> O <sub>8</sub> /3DOM-m TiSiWO, d: Mn <sub>0.6</sub> Co <sub>0.4</sub> O <sub>8</sub> /3DOM-m TiSiWO, e: Mn <sub>0.5</sub> Co <sub>0.5</sub> O <sub>8</sub> /3DOM-m TiSiWO, f: Mn <sub>0.4</sub> Co <sub>0.6</sub> O <sub>8</sub> /3DOM-m TiSiWO, g: Mn <sub>0.2</sub> Co <sub>0.8</sub> O <sub>8</sub> /3DOM-m TiSiWO, h: Co <sub>3</sub> O <sub>4</sub> /3DOM-m TiSiWO)..... | <b>S12</b> |
| <b>Fig. S4.</b> Raman spectra of Mn <sub>x</sub> Co <sub>1-x</sub> O <sub>8</sub> /3DOM-m TiSiWO catalysts with different x values<br><br>(a: 3DOM-m TiSiWO, b: MnO <sub>8</sub> /3DOM-m TiSiWO, c: Mn <sub>0.8</sub> Co <sub>0.2</sub> O <sub>8</sub> /3DOM-m TiSiWO, d: Mn <sub>0.6</sub> Co <sub>0.4</sub> O <sub>8</sub> /3DOM-m TiSiWO, e: Mn <sub>0.5</sub> Co <sub>0.5</sub> O <sub>8</sub> /3DOM-m TiSiWO, f: Mn <sub>0.4</sub> Co <sub>0.6</sub> O <sub>8</sub> /3DOM-m TiSiWO, g: Mn <sub>0.2</sub> Co <sub>0.8</sub> O <sub>8</sub> /3DOM-m TiSiWO, h: Co <sub>3</sub> O <sub>4</sub> /3DOM-m TiSiWO).....                            | <b>S13</b> |
| <b>Fig. S5.</b> (A) NO conversion and (B) CO <sub>2</sub> concentration of Mn <sub>0.5</sub> Co <sub>0.5</sub> O <sub>8</sub> /3DOM-m TiSiWO catalyst in the presence or absence of water vapor.                                                                                                                                                                                                                                                                                                                                                                                                                                                 |            |

(Reaction conditions: 1000 ppm NO, 1000 ppm NH<sub>3</sub>, 5% O<sub>2</sub>, 5% H<sub>2</sub>O, balance N<sub>2</sub>.)

..... S14

**Fig. S6.** (A) NO conversion and (B) CO<sub>2</sub> concentration of Mn<sub>0.5</sub>Co<sub>0.5</sub>O<sub>8</sub>/3DOM-m TiSiWO catalyst in the presence or absence of NH<sub>3</sub>.

(Reaction conditions: 1000 ppm NO, 1000 ppm NH<sub>3</sub>, 5% O<sub>2</sub>, 5% H<sub>2</sub>O, balance N<sub>2</sub>.)

..... S15

**Fig. S7.** (A) NO conversion and (B) Soot conversion of the catalysts

(Reaction conditions: (A) 1000 ppm NO, 1000 ppm NH<sub>3</sub>, 5% O<sub>2</sub>, 5% H<sub>2</sub>O, balance N<sub>2</sub>, flow rate = 300 ml min<sup>-1</sup>; (B) 1000 ppm NO, 1000 ppm NH<sub>3</sub>, 5% O<sub>2</sub>, 5% H<sub>2</sub>O, balance N<sub>2</sub>, flow rate = 100 ml min<sup>-1</sup>.....S16

**Table S1** Textural properties of as-prepared catalysts

| Catalyst                                                          | Surface area(m <sup>2</sup> g <sup>-1</sup> ) <sup>a</sup> | Total pore volume(cm <sup>3</sup> g <sup>-1</sup> ) <sup>b</sup> | Pore size(nm) <sup>c</sup> |
|-------------------------------------------------------------------|------------------------------------------------------------|------------------------------------------------------------------|----------------------------|
| 3DOM-m TiSiWO                                                     | 167.7                                                      | 0.260                                                            | 6.3                        |
| MnO <sub>8</sub> /3DOM-m TiSiWO                                   | 56.2                                                       | 0.109                                                            | 7.2                        |
| Mn <sub>0.8</sub> Co <sub>0.2</sub> O <sub>8</sub> /3DOM-m TiSiWO | 57.9                                                       | 0.118                                                            | 7.3                        |
| Mn <sub>0.6</sub> Co <sub>0.4</sub> O <sub>8</sub> /3DOM-m TiSiWO | 58.2                                                       | 0.117                                                            | 7.3                        |
| Mn <sub>0.5</sub> Co <sub>0.5</sub> O <sub>8</sub> /3DOM-m TiSiWO | 56.5                                                       | 0.114                                                            | 7.4                        |
| Mn <sub>0.4</sub> Co <sub>0.6</sub> O <sub>8</sub> /3DOM-m TiSiWO | 59.1                                                       | 0.134                                                            | 8.6                        |
| Mn <sub>0.2</sub> Co <sub>0.8</sub> O <sub>8</sub> /3DOM-m TiSiWO | 62.9                                                       | 0.161                                                            | 9.8                        |
| Co <sub>3</sub> O <sub>4</sub> /3DOM-m TiSiWO                     | 61.5                                                       | 0.125                                                            | 7.9                        |

<sup>a</sup>Calculated by BET method. <sup>b</sup>Calculated by BJH desorption cumulative volume of pores between 1.7 nm and 300 nm diameter. <sup>c</sup>Calculated by BJH desorption average pore diameter.

**Table S2.** Performance of various catalysts for SCR reaction

| Catalyst                                                                 | Feed composition               |                          |                              |                                | GHSV<br>(h <sup>-1</sup> ) | TOF(s <sup>-1</sup> )<br>×10 <sup>-3</sup> | Temperature<br>(°C) <sup>a</sup> | X <sub>NO</sub><br>(%) | Ref.         |
|--------------------------------------------------------------------------|--------------------------------|--------------------------|------------------------------|--------------------------------|----------------------------|--------------------------------------------|----------------------------------|------------------------|--------------|
|                                                                          | NO<br>(ppm)                    | NH <sub>3</sub><br>(ppm) | O <sub>2</sub><br>(vol<br>%) | H <sub>2</sub> O<br>(vol<br>%) |                            |                                            |                                  |                        |              |
| Co-Mn/TiO <sub>2</sub>                                                   | 500                            | 500                      | 5                            | 5                              | 120,000                    | -                                          | 150-200<br>200 <sup>b</sup>      | 80<br>92 <sup>b</sup>  | [1]          |
| 17%Mn <sub>7</sub> Ce <sub>3</sub> -<br>CM                               | 500                            | 550                      | 5                            | 10                             | 20,000                     | -                                          | 125-225<br>175 <sup>b</sup>      | 80<br>75 <sup>b</sup>  | [2]          |
| Mn8/SEP-S                                                                | 600                            | 600                      | 3                            |                                | 30,000                     | 0.3<br>(200 °C)                            | -                                | -                      | [3]          |
| Hierc-<br>MnFe <sub>0.6</sub> Co <sub>0.4</sub><br>O <sub>x</sub>        | 500                            | 500                      | 5                            | 5                              | 60,000                     | 0.583<br>(100 °C)                          | 110-250<br>180 <sup>b</sup>      | 90<br>90 <sup>b</sup>  | [4]          |
| MnO <sub>2</sub> -Co-0.8                                                 | 500                            | 500                      | 5                            | 5                              | 50000                      | -                                          | 240-280<br>110 <sup>b</sup>      | 100<br>75 <sup>b</sup> | [5]          |
| α-<br>Mn <sub>2</sub> O <sub>3</sub> (111)                               | 500                            | 500                      | 5                            | -                              | 36000                      | 3.5<br>(510 °C)                            | 480-620                          | 80                     | [6]          |
| MnO <sub>x</sub> -ZSM-<br>5 (150)                                        | 500                            | 500                      | 4                            | -                              | 30000                      | 0.293<br>(100 °C)                          | 190-290                          | 100                    | [7]          |
| Mn/TiSi(3:1)                                                             | 900+<br>100N<br>O <sub>2</sub> | 1000                     | 10                           |                                | 80000                      | -                                          | 250                              | 75                     | [8]          |
| MnO <sub>x</sub> /TiO <sub>2</sub> (<br>NS)                              | 1000                           | 1100                     | 4                            | 2.5                            | 50000                      | 0.7<br>(160 °C)                            | 150 <sup>b</sup>                 | 62 <sup>b</sup>        | [9]          |
| CoMn/ZSM-<br>5                                                           | 500                            | 500                      | 5                            | 5                              | 50000                      | -                                          | 100-250 <sup>b</sup>             | 80 <sup>b</sup>        | [10]         |
| Mn <sub>0.5</sub> Co <sub>0.5</sub> O <sub>δ</sub> /<br>3DOM-m<br>TiSiWO | 1000                           | 1000                     | 5                            | 5                              | 20000                      | 0.57<br>(100 °C)                           | 216-426                          | 90                     | This<br>work |

a. Temperature or temperature window corresponding to conversion of NO.

b. NO conversion and corresponding temperature window of the catalysts in the presence of water.

**Table S3.** Performance of various catalysts for soot removal

| Catalyst                                                                 | Feed composition |                          |                            | Flow rate<br>(ml min <sup>-1</sup> ) | Catal/<br>soot | TOF(s <sup>-1</sup> )<br>×10 <sup>-3</sup> | T <sub>10</sub> <sup>a</sup><br>(°C) | T <sub>50</sub> <sup>a</sup> /<br>T <sub>m</sub> <sup>b</sup> (°C) | T <sub>90</sub> <sup>a</sup><br>(°C) | Ref          |
|--------------------------------------------------------------------------|------------------|--------------------------|----------------------------|--------------------------------------|----------------|--------------------------------------------|--------------------------------------|--------------------------------------------------------------------|--------------------------------------|--------------|
|                                                                          | NO<br>(ppm)      | O <sub>2</sub><br>(vol%) | H <sub>2</sub> O<br>(vol%) |                                      |                |                                            |                                      |                                                                    |                                      |              |
| Mn <sub>x</sub> Ce <sub>1-x</sub> O <sub>8</sub> /SiO <sub>2</sub>       | 2000             | 10                       | 10                         | 50                                   | 10             |                                            | -                                    | 350                                                                | -                                    | [11]         |
| α-Mn <sub>2</sub> O <sub>3</sub>                                         | 2500             | 5                        | 10                         | 80                                   | 10             |                                            | -                                    | 420                                                                | -                                    | [12]         |
| α-MnO <sub>2</sub> -<br>Co <sub>3</sub> O <sub>4</sub> /<br>AISI304      | 500              | 6                        | 10                         | 100                                  | 2.5            |                                            | 302                                  | 354                                                                | 395                                  | [13]         |
| Ce <sub>1</sub> MnO <sub>x</sub>                                         | 2000             | 10                       | 10                         | 50                                   | 10             | 0.89<br>(250 °C)                           | 272                                  | 329                                                                | 362                                  | [14]         |
| K-OMS-2-<br>M2                                                           | 2000             | 10                       | 10                         | 50                                   | 10             | 0.91<br>(253 °C)                           | 266                                  | 332                                                                | 428                                  | [15]         |
| Ag/SmMn <sub>2</sub><br>O <sub>5</sub>                                   | 500              | 10                       | 5                          | 500                                  | 10             |                                            | 350                                  |                                                                    |                                      | [16]         |
| Mn <sub>0.5</sub> Co <sub>0.5</sub><br>O <sub>8</sub> /3DOM-<br>m TiSiWO | 1000             | 5                        | 5                          | 100                                  | 10             | 1.47<br>(350 °C)                           |                                      | 448                                                                |                                      | This<br>work |

a. T<sub>10</sub>, T<sub>50</sub> and T<sub>90</sub> represented temperatures for soot conversion at 10%, 50% and 90%, respectively.

b. T<sub>m</sub> represented the temperature of the maximum CO<sub>2</sub> concentration.

**Table S4.** Performance of various catalysts for or simultaneous removal of soot and NO<sub>x</sub>

| Catalyst                                                                                        | Feed composition |                          |                          |                            | Flow rate<br>(ml min <sup>-1</sup> ) | Catal<br>/soot | T(°C) <sup>a</sup> | X <sub>NO</sub><br>(%) | T <sub>m</sub><br>(%)                 | Ref.         |
|-------------------------------------------------------------------------------------------------|------------------|--------------------------|--------------------------|----------------------------|--------------------------------------|----------------|--------------------|------------------------|---------------------------------------|--------------|
|                                                                                                 | NO<br>(ppm)      | NH <sub>3</sub><br>(ppm) | O <sub>2</sub><br>(vol%) | H <sub>2</sub> O<br>(vol%) |                                      |                |                    |                        |                                       |              |
| La <sub>0.7</sub> Ag <sub>0.3</sub><br>MnO <sub>3</sub> -MW                                     | 2000             | -                        | 10                       | -                          | 100                                  | 9/1            | 325                | 60                     | 400                                   | [17]         |
| 4CoAlO-800                                                                                      | 2500             | -                        | 5                        | -                          | 80                                   | 20/1           | 318 <sup>c</sup>   | 3.5 <sup>c</sup>       | 290<br>(T <sub>i</sub> ) <sup>b</sup> | [18]         |
| Co <sub>2.5</sub> Mg <sub>0.5</sub><br>Al <sub>0.92</sub> Ce <sub>0.08</sub>                    | 600              |                          | 20                       |                            | 150                                  | 20/1           | 160                | 15.4                   | 449                                   | [19]         |
| Ce <sub>0.8</sub> Mn <sub>0.1</sub><br>Zr <sub>0.1</sub> O <sub>2</sub>                         | 1000             | 1000                     | 3                        | -                          | 100                                  | 10/1           | 374–512            | 100                    | 402                                   | [20]         |
| Fe <sub>1</sub> -Mn <sub>3</sub> -O <sub>x</sub>                                                | 1000             | 1000                     | 3                        | -                          | 50                                   | 10/1           | 302–485            | 80                     | 487                                   | [21]         |
| (La <sub>1.7</sub> Rb <sub>0.3</sub><br>CuO <sub>4</sub> ) <sub>20</sub><br>/nmCeO <sub>2</sub> | 2000             | -                        | 5                        | -                          | 50                                   | 5/1            | 401 <sup>c</sup>   | 26.8 <sup>c</sup>      | 401                                   | [22]         |
| La <sub>1-x</sub> K <sub>x</sub> MnO <sub>3</sub>                                               | 1000             | -                        | 0.5                      | -                          | 70                                   | 10/1           | 300                | 53                     | 270                                   | [23]         |
| Mn <sub>0.5</sub> Co <sub>0.5</sub> O <sub>8/3</sub><br>DOM-m<br>TiSiWO                         | 1000             | 1000                     | 5                        | 5                          | 100                                  | 10/1           | 216-426            | 97                     | 470                                   | This<br>work |

a. Temperature or temperature window corresponding to conversion of NO.

b. T<sub>i</sub> and T<sub>m</sub> represented initial combustion temperature and the temperature of the maximum CO<sub>2</sub> concentration.

c. N<sub>2</sub> formation of related catalyst and corresponding to temperature.



**Table S5** The reaction rate (r) for NH<sub>3</sub>-SCR/soot combustion and the amount of active oxygen species (O<sub>amount</sub>) for soot combustion

| Catalyst                                                             | $r_{\text{NO}} \times 10^{-5}$<br>(mol g <sup>-1</sup> s <sup>-1</sup> ) | $r_{\text{soot}} \times 10^{-8}$<br>(mol g <sup>-1</sup> s <sup>-1</sup> ) | $O_{\text{amount}} \times 10^{-5}$<br>(mol g <sup>-1</sup> ) |
|----------------------------------------------------------------------|--------------------------------------------------------------------------|----------------------------------------------------------------------------|--------------------------------------------------------------|
|                                                                      | 0.71 (100 °C)                                                            |                                                                            |                                                              |
| MnO <sub>8</sub> /3DOM-m TiSiWO                                      | 1.60 (125 °C)                                                            | 5.35                                                                       | 4.86                                                         |
|                                                                      | 2.59 (150 °C)                                                            |                                                                            |                                                              |
|                                                                      | 1.08 (100 °C)                                                            |                                                                            |                                                              |
| Mn <sub>0.5</sub> Co <sub>0.5</sub> O <sub>8</sub> /3DOM-m<br>TiSiWO | 2.14 (125 °C)                                                            | 4.45                                                                       | 3.02                                                         |
|                                                                      | 3.13 (150 °C)                                                            |                                                                            |                                                              |
|                                                                      | 0.76 (100 °C)                                                            |                                                                            |                                                              |
| Co <sub>3</sub> O <sub>4</sub> /3DOM-m TiSiWO                        | 1.75 (125 °C)                                                            | 3.75                                                                       | 3.01                                                         |
|                                                                      | 2.75 (150 °C)                                                            |                                                                            |                                                              |

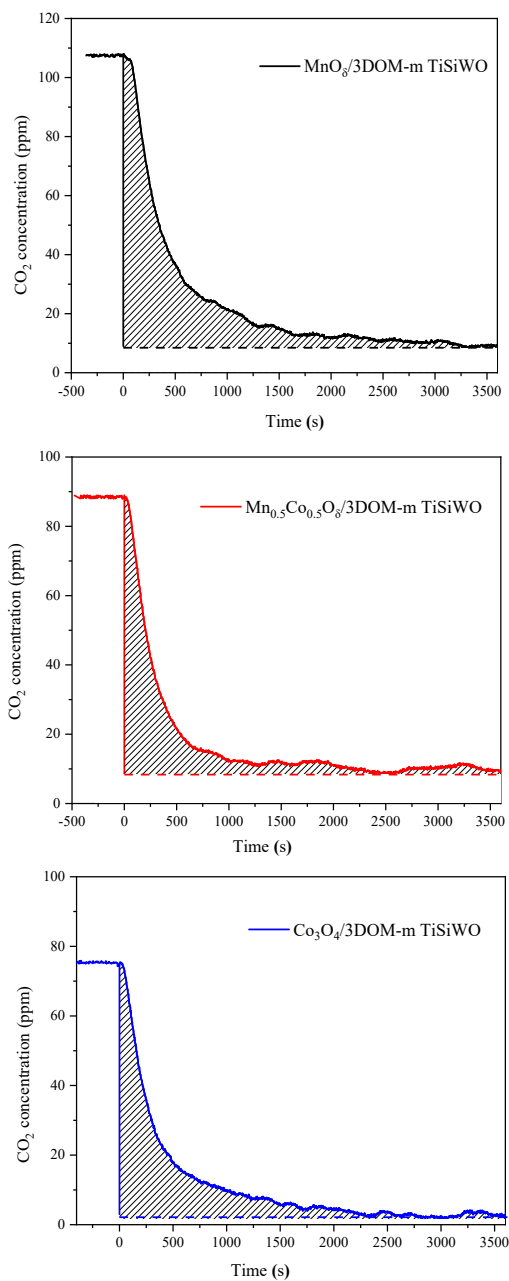

**Fig. S1** CO<sub>2</sub> concentrations at 350 °C as a function of time over catalysts before and after O<sub>2</sub> is removed from the reactant feed. (Reaction conditions: 1000 ppm NO, 1000 ppm NH<sub>3</sub>, 5% O<sub>2</sub>, 5% H<sub>2</sub>O, balance N<sub>2</sub>, flow rate = 150 ml min<sup>-1</sup>)

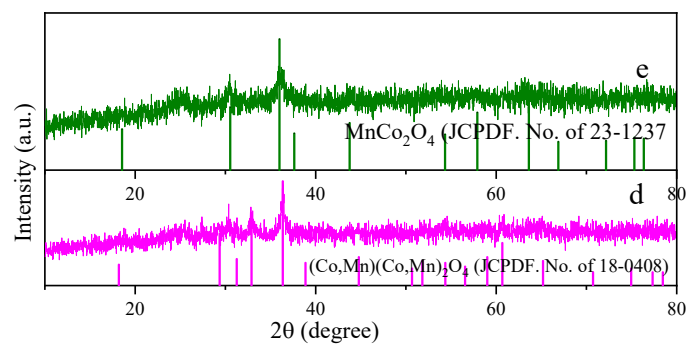

**Fig. S2.** X-ray diffraction patterns of  $Mn_xCo_{1-x}O_8/3DOM\text{-}m$  TiSiWO catalysts with different  $x$  values. (d:  $Mn_{0.6}Co_{0.4}O_8/3DOM\text{-}m$  TiSiWO, e:  $Mn_{0.5}Co_{0.5}O_8/3DOM\text{-}m$  TiSiWO)

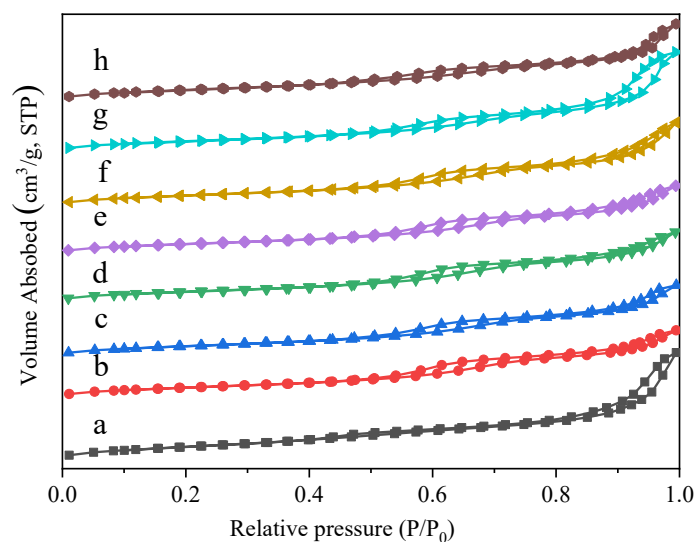

**Fig. S3.** Nitrogen adsorption-desorption isotherms of  $Mn_xCo_{1-x}O_8/3DOM\text{-}m$  TiSiWO catalysts with different  $x$  values

(a: 3DOM- $m$  TiSiWO, b:  $MnO_8/3DOM\text{-}m$  TiSiWO, c:  $Mn_{0.8}Co_{0.2}O_8/3DOM\text{-}m$  TiSiWO, d:  $Mn_{0.6}Co_{0.4}O_8/3DOM\text{-}m$  TiSiWO, e:  $Mn_{0.5}Co_{0.5}O_8/3DOM\text{-}m$  TiSiWO, f:  $Mn_{0.4}Co_{0.6}O_8/3DOM\text{-}m$  TiSiWO, g:  $Mn_{0.2}Co_{0.8}O_8/3DOM\text{-}m$  TiSiWO, h:  $Co_3O_4/3DOM\text{-}m$  TiSiWO)

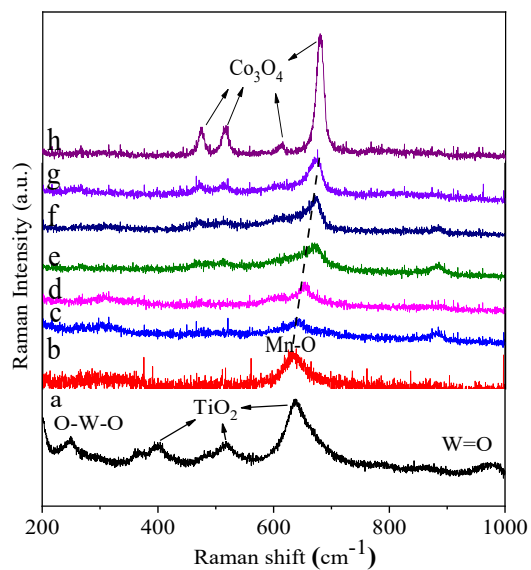

**Fig. S4.** Raman spectra of  $Mn_xCo_{1-x}O_8/3DOM\text{-}m\text{ TiSiWO}$  catalysts with different  $x$  values (a: 3DOM- $m$  TiSiWO, b:  $MnO_8/3DOM\text{-}m\text{ TiSiWO}$ , c:  $Mn_{0.8}Co_{0.2}O_8/3DOM\text{-}m\text{ TiSiWO}$ , d:  $Mn_{0.6}Co_{0.4}O_8/3DOM\text{-}m\text{ TiSiWO}$ , e:  $Mn_{0.5}Co_{0.5}O_8/3DOM\text{-}m\text{ TiSiWO}$ , f:  $Mn_{0.4}Co_{0.6}O_8/3DOM\text{-}m\text{ TiSiWO}$ , g:  $Mn_{0.2}Co_{0.8}O_8/3DOM\text{-}m\text{ TiSiWO}$ , h:  $Co_3O_4/3DOM\text{-}m\text{ TiSiWO}$ )

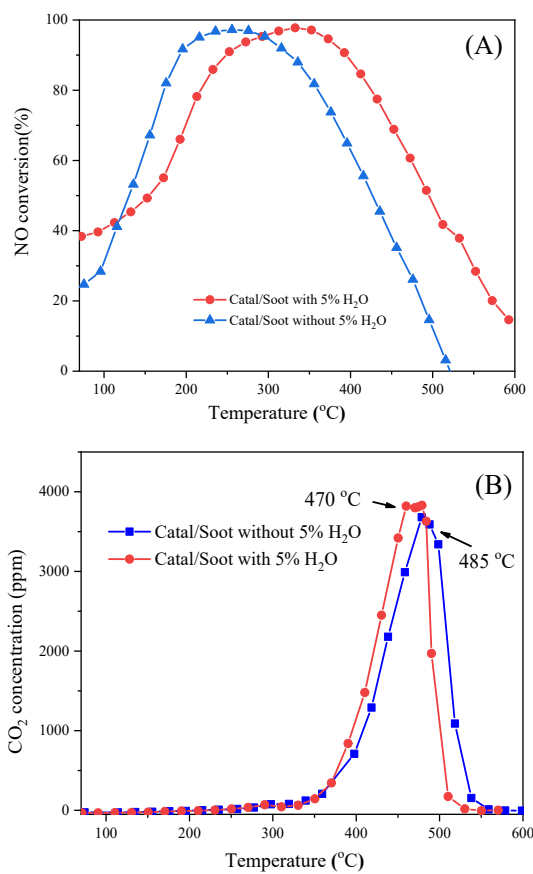

**Fig. S5.** (A) NO conversion and (B) CO<sub>2</sub> concentration of Mn<sub>0.5</sub>Co<sub>0.5</sub>O<sub>8</sub>/3DOM-m TiSiWO catalyst in the presence or absence of water vapor. (Reaction conditions: 1000 ppm NO, 1000 ppm NH<sub>3</sub>, 5% O<sub>2</sub>, 5% H<sub>2</sub>O, balance N<sub>2</sub>.)

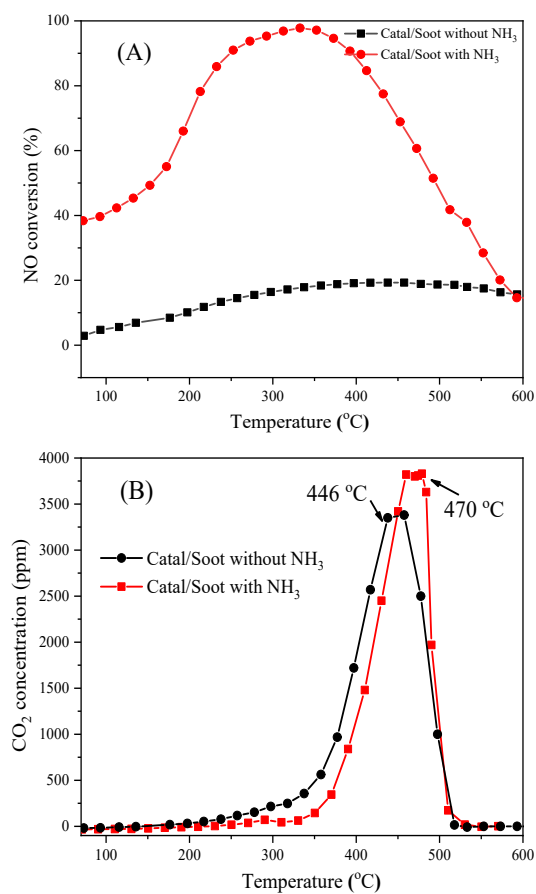

**Fig. S6.** (A) NO conversion and (B)  $\text{CO}_2$  concentration of  $\text{Mn}_{0.5}\text{Co}_{0.5}\text{O}_8/3\text{DOM-m TiSiWO}$  catalyst in the presence or absence of  $\text{NH}_3$ . (Reaction conditions: 1000 ppm NO, 1000 ppm  $\text{NH}_3$ , 5%  $\text{O}_2$ , 5%  $\text{H}_2\text{O}$ , balance  $\text{N}_2$ .)

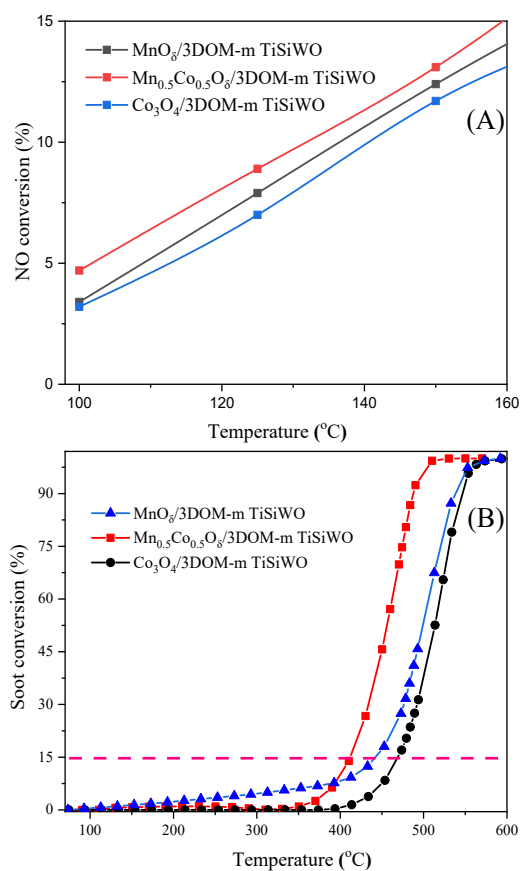

**Fig. S7.** (A) NO conversion and (B) Soot conversion of the catalysts (Reaction conditions: (A) 1000 ppm NO, 1000 ppm NH<sub>3</sub>, 5% O<sub>2</sub>, 5% H<sub>2</sub>O, balance N<sub>2</sub>, flow rate = 300 ml min<sup>-1</sup>; (B) 1000 ppm NO, 1000 ppm NH<sub>3</sub>, 5% O<sub>2</sub>, 5% H<sub>2</sub>O, balance N<sub>2</sub>, flow rate = 100 ml min<sup>-1</sup>;) )



## References

- 1 S. Z Xie, L. L. Li, L. J. Jin, Y. H. Wu, H. Liu, Q. J. Qin, X. L. Wei, J. X. Liu, L. H. Dong, B. Li, *Appl. Sur. Sci.*, 2020, **515**, 146014–146026.
- 2 S. Q Ni, X. L Tang, H. H. Yi, F. Y. Gao, C. Z. Wang, Y. R. Shi, R. C. Zhang, W. J. Zhu, *J. Rare Earth.*, 2020, In press, <https://doi.org/10.1016/j.jre.2020.12.015>.
- 3 X. L. Zhang, Q. Wu, Q. C. Diao, J. W. Wang, K. S. Xiao, B. J. Yang, X. P. Wu, *Chem. Eng. J.*, 2019, **370**, 364–371.
- 4 Y. L. Li, S. Y. Yang, H. G. Peng, W. M. Liu, Y. Y. Mi, Z. Wang, C. J. Tang, D. S. Wu, T. C. An, *J. Catal.*, 2021, **395**, 195–209.
- 5 H. X. Jiang, J. Wang, J. L. Zhou, Y. F. Chen, M. H. Zhang, *Ind. Eng. Chem. Res.*, 2019, **58**, 1760–1768.
- 6 Z. Y. Fan, Z. Y. Wang, J. W. Shi, C. Gao, G. Gao, B. R. Wang, Y. Wang, X. Chen, C. He, C. M. Niu, *J. Catal.*, 2019, **370**, 30–37.
- 7 T. Qiao, Z. G. Liu, C. H. Liu, W. Meng, H. Sun, Y. Lu, *Appl. Catal. A*, 2021, 617, 118128–118136.
- 8 T. Boningari, D. K. Pappas, P. R. Ettireddy, A. Kotrba, P. G. Smirniotis, *Ind. Eng. Chem. Res.*, 2015, **54**, 2261–2273.
- 9 S. C. Deng, T. T. Meng, B. L. Xu, F. Gao, Y. H. Ding, L. Yu, Y. N. Fan, *ACS Catal.* 2016, **6**, 5807–5815.
- 10 S. Q. Zhang, C. Zhang, Q. Wang, W. S. Ahn, *Ind. Eng. Chem. Res.*, 2019, **58**, 22857–22865.
- 11 X. H. Yu, L. Y. Wang, M. Z. Chen, X. Q. Fan, Z. Zhao, K. Cheng, Y. S. Chen, Z. Sojka, Y. C. Wei, J. Liu, *Appl. Catal. B*, 2019, **254**, 246–259.
- 12 L. Cheng, Y. Men, J. G. Wang, H. Wang, W. An, Y. Q. Wang, Z. C. Duan, J. Liu, *Appl. Catal. B*, 2017, **204**, 374–384.
- 13 G. Liu, J. H. Yu, L. Chen, N. J. Feng, J. Meng, F. Fang, P. Zhao, L. Wang, H. Wan, G. F. Guan, *Ind. Eng. Chem. Res.*, 2019, **58**, 13935–13949.
- 14 D. Yu, C. Peng, X. H. Yu, L. Y. Wang, K. X. Li, Z. Zhao, Z. G. Li, *Fuel*, 2022, **307**, 121803–121817.
- 15 D. Yu, Y. Ren, X. H. Yu, X. Q. Fan, L. Y. Wang, R. D. Wang, Z. Zhao, K. Cheng, Y. S. Chen, Z. Sojka, A. Kotarba, Y. C. Wei, J. Liu, *Appl. Catal. B*, 2021, **285**, 119779–119793.
- 16 B. F. Jin, B. H. Zhao, S. Liu, Z. G. Li, K. X. Li, R. Ran, Z. C. Si, D. Weng, X. D. Wu, *Appl. Catal. B*, 2020, **273**, 119058–119068.
- 17 L. Urán, J. Gallego, W. Y. Li, A. Santamaría, *Appl. Catal. A*, 2019, **569**, 157–169.
- 18 Z. P. Wang, Z. Jiang, W. F. Shanguan, *Catal. Commun.* 2007, **8**, 1659–1664.
- 19 F. F. Dai, M. Meng, Y. Q. Zha, Z. Q. Li, T. D. Hu, Y. N. Xie, J. Zhang, *Fuel Process. Technol.*, 2012, **104**, 43–49.
- 20 Y. Cheng, J. Liu, Z. Zhao, W. Y. Song, Y. C. Wei, *Chem. Eng. Sci.* 2017, **167**, 219–228.
- 21 J. B. Tan, Y. C. Wei, Y. Q. Sun, J. Liu, Z. Zhao, W. Y. Song, J. M. Li, X. Zhang, *J. Ind. Eng. Chem.*, 2018, **63**, 84–94.
- 22 J. Liu, Z. Zhao, C. M. Xu, A. J. Duan, G. Y. Jiang, *Ind. Eng. Chem. Res.*, 2010, **49**, 3112–3119.
- 23 G. C. Dhal, S. Dey, D. Mohan, R. Prasad, *Mater. Discov.*, 2017, **10**, 37–42.
